# Supplementary material
Source: ML conference proceedings conference paper supplement (https://openaccess.thecvf.com/content/ICCV_2019/html/Zhou_Prior-Aware_Neural_Network_ICCV_2019_paper.html)
Supplement: Supplementary file 1 [file Zhou_Prior-Aware_Neural_Network_ICCV_2019_supplemental.pdf]

# Supplementary Material for “Prior-aware Neural Network for Partially-Supervised Multi-Organ Segmentation”

This document contains the supplementary material for “Prior-aware Neural Network for Partially-Supervised Multi-Organ Segmentation”. The primary goal of the supplementary material is to present a list of partially-labeled abdominal CT datasets we have collected in Sec. 1. More qualitative examples are given in Sec. 2. Additionally, we also provide the full results of Table 3 in Section 4.4 of the main text.

## 1. Summary of Partially-labeled Datasets

To facilitate the research on partially-supervised multi-organ segmentation, we have collected a list of partially-labeled datasets to the best of our knowledge. We present them in Table 1 for the fellow researchers to explore partial supervision in multi-organ segmentation problems by leveraging these partially-labeled datasets. Note that our method can be also easily applied to these datasets for improving the segmentation performance.

| Name                           | Target Organs                                        | N                | Link                                                                                                                                            |
|--------------------------------|------------------------------------------------------|------------------|-------------------------------------------------------------------------------------------------------------------------------------------------|
| Anatomy3                       | Liver<br>Pancrea<br>Stomach<br>Spleen<br>Gallbladder | 20               | <a href="http://www.visceral.eu/benchmarks/anatomy3-open/">http://www.visceral.eu/benchmarks/anatomy3-open/</a>                                 |
| Pancreas-CT                    | Pancreas                                             | 82               | <a href="https://wiki.cancerimagingarchive.net/display/Public/Pancreas-CT">https://wiki.cancerimagingarchive.net/display/Public/Pancreas-CT</a> |
| ISBI 2019 Challenge            | Liver                                                | 30               | <a href="https://chaos.grand-challenge.org/Data/">https://chaos.grand-challenge.org/Data/</a>                                                   |
| Medical Segmentation Decathlon | Liver<br>Spleen<br>Pancreas                          | 131<br>41<br>282 | <a href="http://medicaldecathlon.com">http://medicaldecathlon.com</a>                                                                           |
| Sliver07                       | Liver                                                | 20               | <a href="http://sliver07.org/">http://sliver07.org/</a>                                                                                         |
| MICCAI 2017 LiTS               | Liver                                                | 131              | <a href="https://competitions.codalab.org/competitions/17094">https://competitions.codalab.org/competitions/17094</a>                           |

Table 1. Summary of partially-labeled datasets for multi-organ segmentation. N denotes the number of annotated cases.

## 2. Qualitative Evaluation

We include more qualitative results in Fig. 1, where we also show improved regions compared with fully-supervision other than the pancreas, portal vein & splenic vein, left adrenal gland as discussed in the main manuscript. In Fig. 1, we can see an evident improvement of the pancreas (row 1-3), the gallbladder (row 2), the left adrenal gland (row 3-4), the stomach (row 3-6), and the portal vein & the splenic vein (row 6).

## 3. Generalization to Other Datasets

The **complete** results of Table 3 in the main manuscript are summarized in Table 2, where the proposed PaNN also achieves the best performance compared with existing methods.

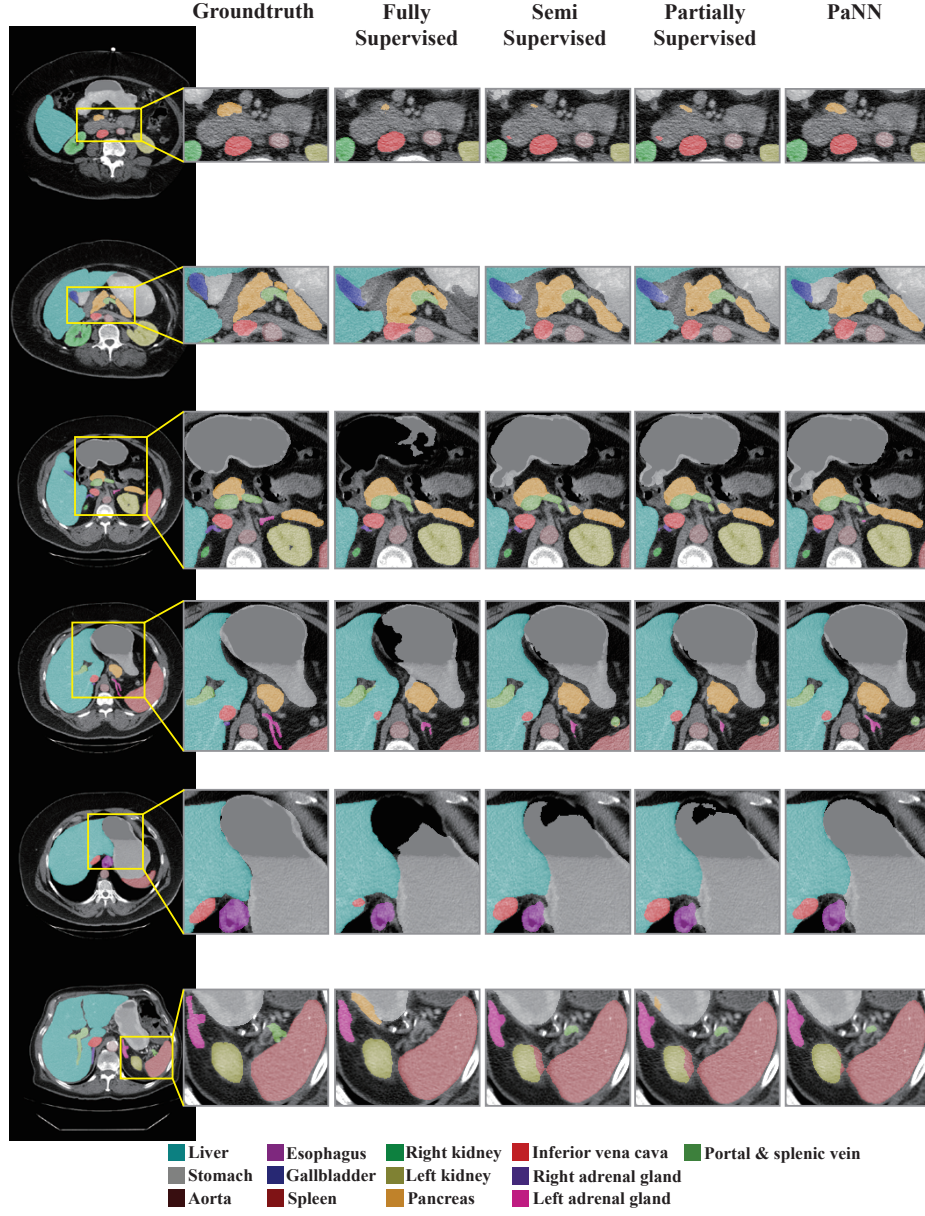

Figure 1. Qualitative comparison of different methods, where all the 3 partially-labeled datasets **A,B,C** are used as the partial supervision with ResNet-101 as the backbone model. We exhibit 5 cases (6 slices) as examples. Improved segmentation regions are zoomed in from the axial view to demonstrate finer details. Besides the pancreas, portal vein & splenic vein, left adrenal gland, we also show other improved regions such as the stomach, gallbladder, *etc.*

| Organ        | Fully Supervised | Semi Supervised | Partially Supervised ( <b>ours</b> ) | PaNN ( <b>ours</b> ) |
|--------------|------------------|-----------------|--------------------------------------|----------------------|
| Spleen       | 0.9640           | 0.9651          | 0.9673                               | 0.9666               |
| Right kidney | 0.9626           | 0.9627          | 0.9625                               | 0.9615               |
| Left kidney  | 0.9530           | 0.9547          | 0.9526                               | 0.9541               |
| Gallbladder  | 0.8225           | 0.8399          | 0.8465                               | 0.8467               |
| Liver        | 0.9684           | 0.9691          | 0.9691                               | 0.9689               |
| Stomach      | 0.9344           | 0.9363          | 0.9396                               | 0.9361               |
| Aorta        | 0.9110           | 0.9096          | 0.9121                               | 0.9133               |
| IVC          | 0.8083           | 0.8175          | 0.7995                               | 0.8266               |
| Pancreas     | 0.7831           | 0.7994          | 0.8079                               | 0.8193               |
| avg. Dice    | 0.9008           | 0.9060          | 0.9063                               | <b>0.9103</b>        |

Table 2. Performance comparison on a newly collected high-quality abdominal dataset, where our method achieves the best result.
